# Supplementary material for: Bacteriological quality of drinking water from source and point of use and associated factors among households in Eastern Ethiopia
Source: PubMed Central journal article supplement (PMC8519474; doi:10.1371/journal.pone.0258806), 2021-10-15
Supplement: pone.0258806.s004.pdf [file pone.0258806.s004.pdf]

## English version questionnaire

Kebele: \_\_\_\_\_ Household ID \_\_\_\_\_

Name of Data Collector: \_\_\_\_\_ Signature \_\_\_\_\_ Date: \_\_\_\_\_

### Part I: Socio-Economic and demographic characteristics

| S. No | Variable                              | Response                                                                                                          | Skip |
|-------|---------------------------------------|-------------------------------------------------------------------------------------------------------------------|------|
| 101   | Head of the household                 | 1. Male<br>2. Female                                                                                              |      |
| 102   | Age of respondent:                    | _____                                                                                                             |      |
| 103   | Sex of Respondent                     | 1. Male<br>2. Female                                                                                              |      |
| 104   | Ethnicity of the respondent           | 1. Oromo<br>2. Amhara<br>3. Harari<br>4. Gurage<br>5. Other specify _____                                         |      |
| 105   | Religion of the respondent            | 1. Muslim<br>2. Orthodox<br>3. Protestant<br>4. Other specify _____                                               |      |
| 106   | Educational level respondent          | 1. Unable to read and write<br>2. Able to read and write<br>3. Grade 1-8<br>4. Grade 9-12<br>5. College and above |      |
| 107   | Current Marital status of respondents | 1. Single<br>2. Married<br>3. Divorced<br>4. Widowed<br>5. Others (specify) _____                                 |      |

|     |                                        |                                                                                                                            |  |
|-----|----------------------------------------|----------------------------------------------------------------------------------------------------------------------------|--|
| 108 | Occupation of respondents              | 1. Merchant<br>2. Government employee<br>3. Daily laborer<br>4. Unemployed /not working/pensioned<br>5. Other specify_____ |  |
| 109 | Number of individuals in the household | _____                                                                                                                      |  |
| 110 | Place of Residence                     | 1. Rural                      2. Urban                                                                                     |  |

### Part II: Types of water source

|     |                                                                                  |                                                                                                                                               |                    |
|-----|----------------------------------------------------------------------------------|-----------------------------------------------------------------------------------------------------------------------------------------------|--------------------|
| 201 | What is the immediate water source that is used by the household                 | 1. Piped water into dwelling<br>2. Piped water to yard<br>3. Public tap<br>4. Protected well<br>5. Protected spring<br>6. Other specify _____ | If 1 or 2, to Q204 |
| 202 | How long does it take to go there, get water and come back?                      | _____ in minutes                                                                                                                              |                    |
| 203 | Who usually goes to this source to fetch the water for your household?           | 3. Adult woman<br>4. Adult man<br>5. Female child (under 15 years)<br>6. Male child (under 15 years)                                          |                    |
| 204 | On average what is the per capita consumption of water for all purposes per day? | _____ liters                                                                                                                                  |                    |
| 205 | Do you pay for water?                                                            | 1. Yes<br>2. No                                                                                                                               |                    |

### Part III. Household water storage and handling

|     |                                                                                |                                                                                                                                                                             |                |
|-----|--------------------------------------------------------------------------------|-----------------------------------------------------------------------------------------------------------------------------------------------------------------------------|----------------|
| 301 | How frequent do you collect water?                                             | <ol style="list-style-type: none"> <li>1. Every day</li> <li>2. Every other day</li> <li>3. Every 3 days</li> <li>4. Every week</li> <li>5. Others specify _____</li> </ol> |                |
| 302 | For how long do you store drinking water                                       | _____Days                                                                                                                                                                   |                |
| 303 | Type of water storage container                                                | <ol style="list-style-type: none"> <li>1. Jerican</li> <li>2. Bucket</li> <li>3. Other specify _____</li> </ol>                                                             |                |
| 304 | Does it have a cover (Observe)                                                 | <ol style="list-style-type: none"> <li>3. Yes</li> <li>4. No</li> </ol>                                                                                                     |                |
| 305 | Do you wash your storage container regularly                                   | <ol style="list-style-type: none"> <li>1. Yes</li> <li>2. No</li> </ol>                                                                                                     | If 2, to Q 307 |
| 306 | How frequently do you wash the storage container                               | <ol style="list-style-type: none"> <li>1. Daily ____</li> <li>2. Every 3 days</li> <li>3. Weekly</li> <li>4. Every 15 days</li> <li>5. Never</li> </ol>                     |                |
| 307 | What method do you use to withdraw water from container                        | <ol style="list-style-type: none"> <li>1. Pouring</li> <li>2. Dipping</li> </ol>                                                                                            | If 1, to Q 309 |
| 308 | If Dipping does the utensil used to draw water from the container has a handle | <ol style="list-style-type: none"> <li>1. Yes</li> <li>2. No</li> </ol>                                                                                                     |                |
| 309 | Does the storage containers accessible to children                             | <ol style="list-style-type: none"> <li>1. Yes</li> <li>2. No</li> </ol>                                                                                                     |                |
| 310 | Where do you regularly place cups used for drinking                            | <ol style="list-style-type: none"> <li>1. On the floor</li> <li>2. Place prepared for it</li> <li>3. On the water container</li> <li>4. Other specify _____</li> </ol>      |                |

## Part IV: Housing and Sanitation facilities

|     |                                                                       |                                                                                                                                                                                                                       |                |
|-----|-----------------------------------------------------------------------|-----------------------------------------------------------------------------------------------------------------------------------------------------------------------------------------------------------------------|----------------|
| 401 | What kind of toilet facility do members of your household usually use | <ol style="list-style-type: none"> <li>1. Pour flush</li> <li>2. Ventilated improved pit latrine (VIP)</li> <li>3. Pit latrine</li> <li>4. No facilities or bush or field</li> <li>5. Others specify _____</li> </ol> |                |
| 402 | Do you share this facility with other households?                     | <ol style="list-style-type: none"> <li>1. Yes</li> <li>2. No</li> </ol>                                                                                                                                               | If 2, to Q 404 |
| 403 | How many other households share this toilet?                          | _____ household                                                                                                                                                                                                       |                |
| 404 | Where do you dispose child feces?                                     | <ol style="list-style-type: none"> <li>1. Child use latrine</li> <li>2. Put/rinsed in to the latrine</li> <li>3. Left open</li> <li>4. Throw into the garbage</li> <li>5. Other specify _____</li> </ol>              |                |
| 405 | Where the households usually dispose the solid waste?                 | <ol style="list-style-type: none"> <li>1. Open space</li> <li>2. Dump in waste pit</li> <li>3. Burning</li> <li>4. Composting</li> <li>5. Others specify _____</li> </ol>                                             |                |
| 406 | Where the households usually dispose the liquid waste?                | <ol style="list-style-type: none"> <li>1. Soak pit</li> <li>2. Latrine</li> <li>3. Flash away</li> <li>4. Others specify _____</li> </ol>                                                                             |                |
| 407 | Do animals share the house?                                           | <ol style="list-style-type: none"> <li>1. Yes</li> <li>2. No</li> </ol>                                                                                                                                               |                |

## Part V- Hygienic Practice

|     |                                                 |                                                                         |                |
|-----|-------------------------------------------------|-------------------------------------------------------------------------|----------------|
| 501 | Do you wash your hands before water collection? | <ol style="list-style-type: none"> <li>1. Yes</li> <li>2. No</li> </ol> | If 2, to Q 503 |
| 502 | Do you wash your hand after visiting a toilet?  | <ol style="list-style-type: none"> <li>1. Yes</li> <li>2. No</li> </ol> | If 2, to Q 505 |

|     |                                                          |                                 |                |
|-----|----------------------------------------------------------|---------------------------------|----------------|
| 503 | If yes to Q502 do you use a soap to wash your hands?     | 1. Yes<br>2. No                 |                |
| 504 | Do you wash your hand after cleaning a child             | 1. Yes<br>2. No                 | If 2, to Q 507 |
| 505 | If yes to Q504 do you use a soap to wash your hands?     | 1. Yes<br>2. No                 |                |
| 506 | Do you wash your hands before feeding children?          | 1. Yes<br>2. Sometimes<br>3. No | If 3, to 508   |
| 507 | If yes to Q506 do you use a soap to wash your hands?     | 1. Yes<br>2. No                 |                |
| 508 | Is there a place for washing hands? (observe)            | 3. Yes<br>4. No                 | If 2, to Q601  |
| 509 | Is the water available? (observe)                        | 1. Yes<br>2. No                 |                |
| 510 | Is there any soap or cleansing agent like ash? (observe) | 1. Yes<br>2. No                 |                |

### **Part VI: Household water treatment**

|     |                                                    |                                                                                                                                |  |
|-----|----------------------------------------------------|--------------------------------------------------------------------------------------------------------------------------------|--|
| 601 | Does the family/household use any water treatment? | 1. Yes<br>2. No                                                                                                                |  |
| 602 | If Yes to above question , which method            | 1. Add bleach/ chlorine<br>2. Strain it through a cloth<br>3. Let it stand and settle<br>4. Boiling<br>5. Others specify _____ |  |

## Part VII: Knowledge on the causes of drinking water contamination

|     |                                                                                           |                                                                 |  |
|-----|-------------------------------------------------------------------------------------------|-----------------------------------------------------------------|--|
| 701 | Where do you think drinking water contamination occurs?                                   | 1. At source<br>2. In household<br>3. Both<br>4. Others specify |  |
| 702 | Do you think cleansing water collection and storage material prevent water contamination? | 1. Yes<br>2. No                                                 |  |
| 703 | Do you think washing hands before water collection can prevent water contamination?       | 1. Yes<br>2. No                                                 |  |
| 704 | Do you think washing hands after defecation can prevent water contamination?              | 1. Yes<br>2. No                                                 |  |
| 705 | Do you think proper utilization of latrine can prevent water contamination?               | 1. Yes<br>2. No                                                 |  |
| 706 | Do you think treating water in household can prevent water contamination?                 | 1. Yes<br>2. No                                                 |  |
| 707 | Do you receive WASH education in the last months                                          | 1. Yes<br>2. No                                                 |  |

## Part VIII: Questions to assess the current family wealth (Economic condition)

Could you tell me if you have the following in your house?

| Asset type              | Response |         |
|-------------------------|----------|---------|
| <b>Domestic animals</b> |          |         |
| Ox                      | No (0)   | Yes (1) |
| Cow                     | No (0)   | Yes (1) |
| Calf                    | No (0)   | Yes (1) |
| Sheep                   | No (0)   | Yes (1) |
| Goat                    | No (0)   | Yes (1) |
| Horse                   | No (0)   | Yes (1) |
| Donkey                  | No (0)   | Yes (1) |
| Cock and Hen            | No (0)   | Yes (1) |

|                                  |                                                      |                                      |
|----------------------------------|------------------------------------------------------|--------------------------------------|
| <b>Durable assets</b>            |                                                      |                                      |
| Television                       | No (0)                                               | Yes (1)                              |
| Radio                            | No (0)                                               | Yes (1)                              |
| Electricity                      | No (0)                                               | Yes (1)                              |
| Refrigerator                     | No (0)                                               | Yes (1)                              |
| Conventional telephone           | No (0)                                               | Yes (1)                              |
| Mobile phone                     | No (0)                                               | Yes (1)                              |
| Car                              | No (0)                                               | Yes (1)                              |
| Motorcycle                       | No (0)                                               | Yes (1)                              |
| Cycle                            | No (0)                                               | Yes (1)                              |
| Cart                             | No (0)                                               | Yes (1)                              |
| Gold, money                      | No (0)                                               | Yes (1)                              |
| Ownership of owned living house  | No (0)                                               | Yes (1)                              |
| Ownership of agricultural land   | No (0)                                               | Yes (1)                              |
| <b>Productive assets</b>         |                                                      |                                      |
| Plough plow                      | No (0)                                               | Yes (1)                              |
| Axe                              | No (0)                                               | Yes (1)                              |
| Hoe                              | No (0)                                               | Yes (1)                              |
| Shovel                           | No (0)                                               | Yes (1)                              |
| Sickle                           | No (0)                                               | Yes (1)                              |
| Modern beehive                   | No (0)                                               | Yes (1)                              |
| Traditional beehive              | No (0)                                               | Yes (1)                              |
| <b>Housing characteristics</b>   |                                                      |                                      |
| Indoor plumbing/ pipe water      | No (0)                                               | Yes (1)                              |
| Type of flooring                 | Earth/dung (0)                                       | Cement/raw wood (1)                  |
| Toilet facility                  | Unsanitary or traditional pit latrine/ no toilet (0) | Sanitary or improved pit latrine (1) |
| <b>Other household materials</b> |                                                      |                                      |
| Sofa                             | No (0)                                               | Yes (1)                              |
| Bed                              | No (0)                                               | Yes (1)                              |
| Table                            | No (0)                                               | Yes (1)                              |
| Chair                            | No (0)                                               | Yes (1)                              |

|       |        |         |
|-------|--------|---------|
| Stove | No (0) | Yes (1) |
|-------|--------|---------|

**Part IX: Household (Point of use) Water Sample Collection**

|                         |                      |
|-------------------------|----------------------|
| Household ID _____      | Date collected _____ |
| Name of Kebele _____    | Time collected _____ |
| Village Name _____      |                      |
| Water source name _____ |                      |
| Water sample code _____ |                      |

Name of data collector \_\_\_\_\_ Signature \_\_\_\_\_

**Part X: Water Sample Collection from Water Sources**

|                         |                      |
|-------------------------|----------------------|
| Water Source Name _____ | Date collected _____ |
| Name of Kebele _____    | Time collected _____ |
| Village Name _____      |                      |
| Water sample code _____ |                      |

Name of Sample collector \_\_\_\_\_ Signature \_\_\_\_\_



## Part XI: Laboratory result reporting format

| <b>No.</b> | <b>Type of Test</b>        | <b>Result</b>                                       | <b>Remark</b> |
|------------|----------------------------|-----------------------------------------------------|---------------|
| <b>1.</b>  | <b>Membrane Filtration</b> | _____ <b>Thermotolerant Coliform colonies/100ml</b> |               |

Name of laboratory investigator \_\_\_\_\_

Signature: \_\_\_\_\_

Date: \_\_\_\_\_
