# Supplementary material for: Bacteriological quality of drinking water from source and point of use and associated factors among households in Eastern Ethiopia
Source: PubMed Central journal article supplement (PMC8519474; doi:10.1371/journal.pone.0258806), 2021-10-15
Supplement: pone.0258806.s005.pdf [file pone.0258806.s005.pdf]

## የአማርኛ መጠይቅ

ይህ መጠየቅ የመጠጥ ውሃ ንጽህና ክጀርም (ተዋህስያን) አንጻር ከመነሻ እስከ መኖሪያ ቤት ያለውን ልዩነት እና አጋላጭ ምክንያቶችን ለማጥናት የተዘጋጀ መጠይቅ ነው።

ቀበሌ \_\_\_\_\_ ክድ \_\_\_\_\_  
 መረጃ ሰብሳቢው ስም \_\_\_\_\_ ፊርማ \_\_\_\_\_ ቀን \_\_\_\_\_

### ክፍል አንድ፡- የማህበራዊ እና ኢኮኖሚያዊ ሁኔታ

| የጥያቄ ቁጥር | ጥያቄ               | የጥያቄ ምርጫ                                                                                  | ዝላል |
|----------|-------------------|-------------------------------------------------------------------------------------------|-----|
| 101      | የቤተሰብ ሀላፊ         | 1. ወንድ<br>2. ሴት                                                                           |     |
| 102      | ዕድሜዎ ስንት ነው?      | _____                                                                                     |     |
| 103      | የተሳታፊ ያታ          | 1. ወንድ<br>2. ሴት                                                                           |     |
| 104      | ብሄር               | 1. ኦሮሞ<br>2. አማራ<br>3. ሃረሪ<br>4. ጉራጌ<br>5. ሌሎች ካሉ ይጠቀስ _____                              |     |
| 105      | ሐይማኖት             | 1. ሙስሊም<br>2. ኦርቶዶክስ ክርስቲያን<br>3. ፕሮቴስታንት (ፔንጤ)<br>4. ሌላ ካለ ይጥቀሱ _____                    |     |
| 106      | የት/ት ደረጃዎ ስንት ነው? | 1. ማንበብና መጻፍ የማይችሉ<br>2. ማንበብና መጻፍ የሚችሉ (መደበኛ ያልሆነ ትምህርት)<br>3. አንደኛ ደረጃ (1-8ኛ ክፍል) ያጠናቀቀ |     |



|     |                                       |                                                                                                                                                    |  |
|-----|---------------------------------------|----------------------------------------------------------------------------------------------------------------------------------------------------|--|
| 203 | ውሃውን ከመገገኛ ቦታው ቀድቶ የሚያመጣው ማነው?        | <ol style="list-style-type: none"> <li>1. አዋቂ ሴት</li> <li>2. አዋቂ ወንድ</li> <li>3. ሴቶች ህፃናት (ከ15አመትበታች)</li> <li>4. ወንዶች ህፃናት (ከ15አመትበታች)</li> </ol> |  |
| 204 | በቀን ውስጥ በአማካይ አንድ ሰው ምን ያህል ውሃ ይጠቀማል? | _____ (በሊትር)                                                                                                                                       |  |
| 205 | ለውሃ አገልግሎት ይከፍላሉ?                     | <ol style="list-style-type: none"> <li>1. አዎ</li> <li>2. አይ</li> </ol>                                                                             |  |

**ክፍል ሦስት: የመጠጥ ውሃ አቀማመጥና አያያዝ ሁኔታ**

|     |                                             |                                                                                                                                                               |                                 |
|-----|---------------------------------------------|---------------------------------------------------------------------------------------------------------------------------------------------------------------|---------------------------------|
| 301 | በምን ያህል ጊዜ የመጠጥ ውሃ ትቀዳላችሁ?                  | <ol style="list-style-type: none"> <li>1. በየቀኑ</li> <li>2. በየሁለት ቀን ልዩነት</li> <li>3. በየሦስት ቀን ልዩነት</li> <li>4. በየሳምንቱ</li> <li>5. ሌላ ካለ ይጥቀሱ _____</li> </ol> |                                 |
| 302 | ለምን ያህል ጊዜ የመጠጥ ውሃን ታስቀምጣላችሁ?               | _____ (ቀናት)                                                                                                                                                   |                                 |
| 303 | የመጠጥ ውሃን በምን ውስጥ ታስቀምጣላችሁ?                  | <ol style="list-style-type: none"> <li>1. ጆሪካን</li> <li>2. ባልዲ</li> <li>3. ሌላካለይጥቀሱ _____</li> </ol>                                                          |                                 |
| 304 | በጉብገኝቱ ወቅት የመጠጥ ውሃ ማጠራቀሚያው ክዳን አለው? (በምልከታ) | <ol style="list-style-type: none"> <li>3. አዎ</li> <li>4. አይ</li> </ol>                                                                                        |                                 |
| 305 | የመጠጥ ውሃ ማጠራቀሚያው በየጊዜው ይታጠባል?                | <ol style="list-style-type: none"> <li>1. አዎ</li> <li>2. አይ</li> </ol>                                                                                        | <p>2<br/> ከሆነወደጥያቄ<br/> 307</p> |

|     |                                   |                                                                                                                                                                      |                      |
|-----|-----------------------------------|----------------------------------------------------------------------------------------------------------------------------------------------------------------------|----------------------|
| 306 | በየምን ያህል ጊዜ የውሃ ማጠራቀሚያችሁን ታጥባላችሁ? | <ol style="list-style-type: none"> <li>1. በየቀኑ</li> <li>2. በየሦስትቀኑ</li> <li>3. በየሳምንቱ</li> <li>4. በየአስራአምስትቀኑ</li> <li>5. በጭራሽ</li> <li>6. ሌላካለይጥቀሱ _____</li> </ol> |                      |
| 307 | የመጠጥ ውሃን እንዴት ከማጠራቀሚያው ትቀዳላችሁ?    | <ol style="list-style-type: none"> <li>1. በማንቆርቆር</li> <li>2. በመጥለቅ</li> </ol>                                                                                       | 1<br>ከሆነወደጥያቄ<br>309 |
| 308 | በመጥለቅ ከሆነ መጥለቂያው መያዣ አለው?         | <ol style="list-style-type: none"> <li>1. አዎ</li> <li>2. አይ</li> </ol>                                                                                               |                      |
| 309 | የመጠጥ ውሃ ማጠራቀሚያውን ልጆች ይደርሱበታል?     | <ol style="list-style-type: none"> <li>1. አዎ</li> <li>2. አይ</li> </ol>                                                                                               |                      |
| 310 | የውሃ መጠጫችሁን የት ታስቀምጣሊችሁ?           | <ol style="list-style-type: none"> <li>1. በወለል ላይ</li> <li>2. ለውሃ መጠጫ ማስቀመጫ በተዘጋጀ ቦታ</li> <li>3. በውሃ ማጠራቀሚያው ላይ ሌላካለይጥቀሱ _____</li> </ol>                            |                      |

**ክፍል አራት: የፅዳት ሁኔታ**

|     |                                      |                                                                                                                                                                                                   |  |
|-----|--------------------------------------|---------------------------------------------------------------------------------------------------------------------------------------------------------------------------------------------------|--|
| 401 | ቤተሰቡ የትገኛውን አይነት የመፀዳጃ አገልግሎት ይጠቀማል? | <ol style="list-style-type: none"> <li>1. በውሃ የሚሰራ መፀዳጃ ቤት</li> <li>2. አየር ማስወጫ ያለው መፀዳጃ ቤት</li> <li>3. አየር ማስወጫ የሌለው መፀዳጃ ቤት</li> <li>4. ምንም የለም (ሜዳ ላይ)</li> <li>5. ሌላ ካለ ይጥቀሱ _____</li> </ol> |  |
|-----|--------------------------------------|---------------------------------------------------------------------------------------------------------------------------------------------------------------------------------------------------|--|

|     |                               |                                                                                                                                                                                  |                              |
|-----|-------------------------------|----------------------------------------------------------------------------------------------------------------------------------------------------------------------------------|------------------------------|
| 402 | መፀዳጃ ቤቱን ሌሎች ቤተሰቦች በጋራ ይጠቀማሉ? | <ol style="list-style-type: none"> <li>1. አዎ</li> <li>2. አይ</li> </ol>                                                                                                           | <p>2</p> <p>ከሆነወደጥያቄ 404</p> |
| 403 | ምን ያህል ቤተሰቦች መፀዳጃ ቤቱን ይጋራሉ?   | _____ ቤተሰብ                                                                                                                                                                       |                              |
| 404 | የህፃናትን አይኑምድር እንዴት ያስወግዳለ?    | <ol style="list-style-type: none"> <li>1. ህፃናቱ መፀዳጃ ቤት ይጠቀማል</li> <li>2. መጸዳጃ ቤት ውስጥ በመደፊት</li> <li>3. ሜዲሊይ</li> <li>4. ከላሊ ቆሻሻ ጋር በመድፋት</li> <li>5. ሌላ ካለ ይጥቀሱ _____</li> </ol> |                              |
| 405 | ደረቅ ቆሻሻን እንዴት ታስወግዳላችሁ?       | <ol style="list-style-type: none"> <li>1. ሜዲ ሊይ</li> <li>2. በመቅበር</li> <li>3. በማቃጠል</li> <li>4. እንዲበሰብስ በማድረግ</li> </ol>                                                         |                              |
| 406 | ከቤት የሚወጣውን ፍሳሽ እንዳት ታስወግዳላችሁ? | <ol style="list-style-type: none"> <li>1. ጉድጓድ ውስጥ በመጨመር</li> <li>2. በመፀዳጃቤት-ውስጥበመጨመር</li> <li>3. ሜዲ ላይ በማፍሰስ</li> <li>4. ላሊ ከሆነ ይጥቀሱ _____</li> </ol>                           |                              |
| 407 | በመኖሪያ ቤቱ ውስጥ እንስሳት አብረው ይኖራሉ? | <ol style="list-style-type: none"> <li>1. አዎ</li> <li>2. አይ</li> </ol>                                                                                                           |                              |

**ክፍል አምስት፡ የንፅህና ሁኔታ**

|     |                                                   |                              |                      |
|-----|---------------------------------------------------|------------------------------|----------------------|
| 501 | ውሃ ከመቅዳትዎ በፊት እጅዎን ይታጠባሉ?                         | 3. አዎ<br>4. አይ               |                      |
| 502 | ከመፀዳጃ ቤት መልስ እጅዎን ይታጠባሉ                           | 1. አዎ<br>2. አይ               | 2<br>ከሆነወደጥያቄ<br>504 |
| 503 | የሚታጠቡ ከሆነ ሳሙና ይጠቀማሉ                               | 1. አዎ<br>2. አይ               |                      |
| 504 | ህጻናትን ካጠቡ በሁዋላ እጅዎን ይታጠባሉ?                        | 1. አዎ<br>2. አይ               | 2<br>ከሆነወደጥያቄ<br>506 |
| 505 | የሚታጠቡ ከሆነ ሳሙናይ ጠቀማሉ?                              | 1. አዎ<br>2. አይ               |                      |
| 506 | ህፃናትን ከመመገብ በፊት እጅዎን ይታጠባሉ?                       | 1. አዎ<br>2. አንዲንዴጊዜ<br>3. አይ | 3<br>ከሆነወደጥያቄ<br>508 |
| 507 | የሚታጠቡ ከሆነ ሳሙና ይጠቀማሉ?                              | 1. አዎ<br>2. አይ               |                      |
| 508 | በግቢው ውስጥ የእጅ መታጠቢያ ቦታ አለ? (በምልከታ)                 | 1. አዎ<br>2. አይ               | 2<br>ከሆነወደጥያቄ<br>601 |
| 509 | ካለ የእጅ መታጠቢያው ውሃ አለው? (በምልከታ)                     | 1. አዎ<br>2. አይ               |                      |
| 510 | ሳሙና ወይም ሌሎች ፅዳትን መጠበቂያዎች እንደ አመድ፣ አሸዋ አሉ? (በምልከታ) | 1. አዎ<br>2. አይ               |                      |

**ክፍል ስድስት: የቤት ውስጥ የመጠጥ ውሃ ህክምና**

|     |                            |                                                                                                                                                                            |                 |
|-----|----------------------------|----------------------------------------------------------------------------------------------------------------------------------------------------------------------------|-----------------|
| 601 | በቤት ውስጥ የመጠጥ ውሃ ህክምና ይጠቀማሉ | <ol style="list-style-type: none"> <li>1. አዎ</li> <li>2. አይ</li> </ol>                                                                                                     | 2 ከሆነ ወደጥያቄ 701 |
| 602 | የሚተቀሙ ከሆነ የትኛውን መንገድ ይጠቀማሉ | <ol style="list-style-type: none"> <li>1. ክሎሪን በመጨመር</li> <li>2. በንፁህ ጨርቅ በማጥለል</li> <li>3. ለተወሰነ ጊዜ አስቀምጦ በማዘቀጥ</li> <li>4. በማፍላት</li> <li>5. ሌላ ካለ ይጥቀሱ _____</li> </ol> |                 |

**ክፍል ሰባት: ለውሃ መበከል አስተዋፅኦ የሚያደርጉ ምክንያቶች ላይ ያለ ግንዛቤ**

|         |                                                                 |                                                                                                                              |  |
|---------|-----------------------------------------------------------------|------------------------------------------------------------------------------------------------------------------------------|--|
| 70<br>1 | የውሃ ብክለት የት ሊከሰት ይችላል ብለው ያስባሉ                                  | <ol style="list-style-type: none"> <li>1. ከመነሻቦታ</li> <li>2. በቤት-ውስጥ</li> <li>3. በሁለቱም</li> <li>4. ሌላካለይጥቀሱ _____</li> </ol> |  |
| 70<br>2 | የውሃ መቅጃና ማጠራቀሚያን ማጠብ የውሃ ብክለትን ይከላከላል ብለው ያስባሉ                  | <ol style="list-style-type: none"> <li>1. አዎ</li> <li>2. አይ</li> </ol>                                                       |  |
| 70<br>3 | የመጠጥ ውሃን ከመቅዳት በፊት እጅን በውሃና በሳሙና መታጠብ የውሃ ብክለትን ይከላከላል ብለው ያስባሉ | <ol style="list-style-type: none"> <li>1. አዎ</li> <li>2. አይ</li> </ol>                                                       |  |
| 70<br>4 | ከመፀዳጃ ቤት መልስ እጅን በውሃና በሳሙና መታጠብ የውሃ ብክለትን ይከላከላል ብለው ያስባሉ       | <ol style="list-style-type: none"> <li>1. አዎ</li> <li>2. አይ</li> </ol>                                                       |  |
| 70<br>5 | መፀዳጃ ቤትን በአግባቡ መጠቀም የውሃ ብክለትን ይከላከላል ብለው ያስባሉ                   | <ol style="list-style-type: none"> <li>1. አዎ</li> <li>2. አይ</li> </ol>                                                       |  |
| 70<br>6 | ውሃን በቤት ውስጥ ማከም የውሃ ብክለትን ይከላከላል ብለው ያስባሉ                       | <ol style="list-style-type: none"> <li>1. አዎ</li> <li>2. አይ</li> </ol>                                                       |  |

|    |                                    |       |  |
|----|------------------------------------|-------|--|
| 70 | ባለፉት 3 ወራት ውስጥ ስለ ውሃ አቅርቦት እና ንጽህና | 1. አዎ |  |
| 7  | በተመለከተ ትምህርት አግኝተው ያውቃለ?           | 2. አይ |  |

**ክፍል ስምንት: የቤተሰብ የሀብት ጠቋሚ ምክንያቶች**

| ከሚከተሉት ውስጥ የትኛው በቤትዎ ውስጥ ይገኛል? | ምላሽ     |         |
|--------------------------------|---------|---------|
| በሬ                             | የለም (0) | አለ (1 ) |
| ላም                             | የለም (0) | አለ (1 ) |
| ጥጃ                             | የለም (0) | አለ (1 ) |
| በግ                             | የለም (0) | አለ (1 ) |
| ፍየል                            | የለም (0) | አለ (1 ) |
| ፈረስ                            | የለም (0) | አለ (1 ) |
| አህያ                            | የለም (0) | አለ (1 ) |
| ዶሮ                             | የለም (0) | አለ (1 ) |
| <b>ቋሚንብረት</b>                  |         |         |
| ቴሌቭዥን                          | የለም (0) | አለ (1 ) |
| ራዲዮ                            | የለም (0) | አለ (1 ) |
| መብራት                           | የለም (0) | አለ (1 ) |
| ፍርጅ                            | የለም (0) | አለ (1 ) |
| የቤት-ስልክ                        | የለም (0) | አለ (1 ) |
| ተንቀሳቃሽስልክ                      | የለም (0) | አለ (1 ) |
| መኪና                            | የለም (0) | አለ (1 ) |
| ሞተርሳይክል                        | የለም (0) | አለ (1 ) |
| ሳይክል                           | የለም (0) | አለ (1 ) |
| ጋሪ                             | የለም (0) | አለ (1 ) |
| ወርቅ                            | የለም (0) | አለ (1 ) |



|                  |                                      |                                     |
|------------------|--------------------------------------|-------------------------------------|
| የራስሽ(ዎ) መኖሪያቤት   | የለም (0)                              | አለ (1 )                             |
| የራስሽ(ዎ) የእርሻመሬት  | የለም (0)                              | አለ (1 )                             |
| <b>የማምረቻዕቃዎች</b> |                                      |                                     |
| ማረሻ              | የለም (0)                              | አለ (1 )                             |
| መጥረቢያ            | የለም (0)                              | አለ (1 )                             |
| መኮትኮቻ            | የለም (0)                              | አለ (1 )                             |
| አካፋ              | የለም (0)                              | አለ (1 )                             |
| ማጭድ              | የለም (0)                              | አለ (1 )                             |
| ዘመናዊየንብቀፎ        | የለም (0)                              | አለ (1 )                             |
| ባህላዊየንብቀፎ        | የለም (0)                              | አለ (1 )                             |
| <b>የቤቱሁኔታ</b>    |                                      |                                     |
| በቤትውስጥየውሀቧንቧ     | የለም (0)                              | አለ (1 )                             |
| የወለልአይነት         | አፈር (0)                              | ሲሚንቶ/ እንጨት (1 )                     |
| የመፀዳጃ ቤት አይነት    | ንፅህናውን ያልጠበቀ/<br>አየር ማስወጫ<br>የሌለው(0) | ንፅህናውን የጠበቀ/<br>አየር ማስወጫ ያለው<br>(0) |
| <b>የቤትቁሳቁስ</b>   |                                      |                                     |
| ሶፋ               | የለም (0)                              | አለ (1 )                             |
| አልጋ              | የለም (0)                              | አለ (1 )                             |
| ጠረንጴዛ            | የለም (0)                              | አለ (1 )                             |
| ወንበር             | የለም (0)                              | አለ (1 )                             |
| እስቶቭ             | የለም (0)                              | አለ (1 )                             |

**ክፍል ዘጠኝ: ከተመረጡ ቤቶች የውሃ ናሙና መሰብሰቢያ ፎርማት**

|                   |                    |
|-------------------|--------------------|
| የመኖሪያ ቤቱ ኮድ _____ | የተሰበሰበበት ቀን _____  |
| ቀበሌ _____         | የተሰበሰበበት ሰዓት _____ |
| መንደር _____        |                    |
| የውሃው መገኛ ስም _____ |                    |
| የውሃው ናሙና ኮድ _____ |                    |

የሰብሳቢው ስም \_\_\_\_\_ ፊርማ \_\_\_\_\_

**ክፍል አስር: የውሃ መነሻዎች የውሃ ናሙና መሰብሰቢያ ፎርማት**

|                   |                    |
|-------------------|--------------------|
| የውሃው መገኛ ስም _____ | የተሰበሰበበት ቀን _____  |
| ቀበሌ _____         | የተሰበሰበበት ሰዓት _____ |
| መንደር _____        |                    |
| የውሃው ናሙና ኮድ _____ |                    |

የሰብሳቢው ስም \_\_\_\_\_ ፊርማ \_\_\_\_\_

**ክፍል አስራ አንድ - የላቦራቶሪ ውጤት ሪፖርት ፎርም**

| No. | የሙከራ አይነት                          | ውጤት                                    | አስተያየት   |
|-----|------------------------------------|----------------------------------------|----------|
| 1.  | Membrane Filtration<br>(ውሃን በማጣራት) | _____ Thermotolerant<br>colonies/100ml | Coliform |

የላቦራቶሪ መርማሪ ስም \_\_\_\_\_

ፊርማ \_\_\_\_\_

ቀን \_\_\_\_\_
