# Supplementary material for: Bacteriological quality of drinking water from source and point of use and associated factors among households in Eastern Ethiopia
Source: PubMed Central journal article supplement (PMC8519474; doi:10.1371/journal.pone.0258806), 2021-10-15
Supplement: pone.0258806.s006.pdf [file pone.0258806.s006.pdf]

## Gaaffilee Afaan Oromoon qophaa'an

Gaaffileen kun waa'ee qorannoo qabiyyee qulqullinqa bishaaniif jarmiilee dhukkuba namatti fidanii fi isa waliin walqabataniif wantoota jiraniif fi haala bishaanitti fayyadaman bakka madda isaa hanga itti fayyadamanitti qorachoochuuf kan qophaa'e dha.

Kebele \_\_\_\_\_ lakk. adda baasii abbaa warraa (ID) \_\_\_\_\_  
maqaa nama odeeffanoo funaanuu \_\_\_\_\_ mallattoo \_\_\_\_\_ guyyaa \_\_\_\_\_

### kutaa 1ffaa: waa'ee eenyummaa nama gaaffatamee kan mullisu

| lakk | Gaaffii                   | Deebii                                                                                          | Irra darbi |
|------|---------------------------|-------------------------------------------------------------------------------------------------|------------|
| 101  | Abbaa warraa mana         | 1. Dhiira<br>2. Dhalaa                                                                          |            |
| 102  | Umurii kee meeqa ?        | Waggaa-----                                                                                     |            |
| 103  | Abbaa warraa deebii kenne | 1. Dhiira<br>2. Dhalaa                                                                          |            |
| 104  | Qomoo kee maali?          | 1. Oromoo<br>2. Amaara<br>3. Hararii<br>4. Guraagee<br>5. Kan Biraa _____                       |            |
| 105  | Amantiin kee maali?       | 1. Musliima<br>2. Ortoodoksii<br>3. Protestaantii<br>4. Kan Biraa _____                         |            |
| 106  | Sadarkaa barnootaa        | 1. Dubbisuuf Barressuu Kan Hin Dandeenye<br>2. Dubbisuuf Barressuu Kan Dandahuu<br>3. Kutaa 1-8 |            |

|     |                                               |                                                                                                                                                                                                                           |  |
|-----|-----------------------------------------------|---------------------------------------------------------------------------------------------------------------------------------------------------------------------------------------------------------------------------|--|
|     |                                               | <ul style="list-style-type: none"> <li>4. Kutaa 9-12</li> <li>5. Kolleejjii Fi Isaa Ol</li> </ul>                                                                                                                         |  |
| 107 | Haala gaa'elaa                                | <ul style="list-style-type: none"> <li>1. Hin Fuudhiin/Hin Eerumiin</li> <li>2. Kan Fuude Ykn Heerumte</li> <li>3. Kan Hiike /Hiikte</li> <li>4. Kan Irraa Du'e</li> <li>5. Kan Biraa _____</li> </ul>                    |  |
| 108 | Hojiin kee maali?                             | <ul style="list-style-type: none"> <li>1. Daldalaa</li> <li>2. Hojjetaa Mootummaa</li> <li>3. Kan Hin Qacaramne/Kan Hojii<br/>Hin Qabne/Soorama Kan Bahe</li> <li>4. Dafqaan Bulaa</li> <li>5. Kan Biraa _____</li> </ul> |  |
| 109 | Lakkoofsa maatii mana kana keessa jiraatanii? | Lakk _____                                                                                                                                                                                                                |  |
| 110 | Mana jirenyaa                                 | <ul style="list-style-type: none"> <li>1. Badiyaa</li> <li>2. Magaalaa</li> </ul>                                                                                                                                         |  |

### **Kutaa 2ffaa: Gosa madda bishaanii**

|     |                                                         |                                                                                                                                                                                                                                                                   |                                                               |
|-----|---------------------------------------------------------|-------------------------------------------------------------------------------------------------------------------------------------------------------------------------------------------------------------------------------------------------------------------|---------------------------------------------------------------|
| 201 | Bishaan mana kana keessatti fayyadamtan eessaa argattu? | <ul style="list-style-type: none"> <li>1. Bishaan Boombaa Mana Biraa</li> <li>2. Bishaan Boombaa Ooyruu</li> <li>3. Boombaa Magaalaa (Bonoo)</li> <li>4. Bishaan Boollaa Eegamu Irraa</li> <li>5. Laga Burqaa Eegamu Irraa</li> <li>6. Kan Biraa _____</li> </ul> | <p>Yoo 1<br/>ykn 2<br/>tahe,<br/>gara<br/>gaaffii<br/>204</p> |
|-----|---------------------------------------------------------|-------------------------------------------------------------------------------------------------------------------------------------------------------------------------------------------------------------------------------------------------------------------|---------------------------------------------------------------|

|     |                                                                 |                                                                                                                                                                                           |  |
|-----|-----------------------------------------------------------------|-------------------------------------------------------------------------------------------------------------------------------------------------------------------------------------------|--|
| 202 | Bishaan deemtanii fiduuf dhaquuf galuuf daqiiqaa meeqa fudhata? | Daqiiqaaa _____                                                                                                                                                                           |  |
| 203 | Bishaan kana eenyutu fida?                                      | <ol style="list-style-type: none"> <li>1. Dardara Dhiira</li> <li>2. Dardara Dhalaa</li> <li>3. Ijoollee Dhiiraa (Wagaa 15 Gadii)</li> <li>4. Ijoollee Durbaa (Wagaa 15 Gadii)</li> </ol> |  |
| 204 | Guyyaan tokko kessaa nama tokko biishaan hangam fayyadamaa?     | _____ litra                                                                                                                                                                               |  |
| 205 | Bishaanif nikafaltanii                                          | <ol style="list-style-type: none"> <li>1. Eyyee</li> <li>2. Lakkii</li> </ol>                                                                                                             |  |

**Kutaa 3ffaa: Mana keessatti akkaataa bishaan itti taa uu fi itti qabamu**

|     |                                                            |                                                                                                                                                                                       |                          |
|-----|------------------------------------------------------------|---------------------------------------------------------------------------------------------------------------------------------------------------------------------------------------|--------------------------|
| 301 | Bishaan si'a meeqa fidda ?                                 | <ol style="list-style-type: none"> <li>1. Guyyaa Guyyaatti</li> <li>2. Guyyaa Tokko Oolee</li> <li>3. Guyyaa Sadii Booda</li> <li>4. Torbeetti</li> <li>5. Kan Biraa _____</li> </ol> |                          |
| 302 | Bishaan dhugaatii guyyaa meeqaaf mana keessa?              | Guyyaa _____                                                                                                                                                                          |                          |
| 303 | Man keessatti bishaan dhugaatii maal keessa keessa         | <ol style="list-style-type: none"> <li>1. Jarkaana (Mikaa)</li> <li>2. Baaldii</li> <li>3. Kan Biraa _____</li> </ol>                                                                 |                          |
| 304 | Meeshaan itti bishaan keessu qadaada qabaa?(ilaali)        | <ol style="list-style-type: none"> <li>2. Eyyee</li> <li>3. Lakkii</li> </ol>                                                                                                         |                          |
| 305 | Bishaan meeshaa itti waraabduuf itti keewwattu ni dhiqxaa? | <ol style="list-style-type: none"> <li>1. Eyyee</li> <li>2. Lakkii</li> </ol>                                                                                                         | Yoo 2 tahe, gara gaaffii |

|     |                                                                                  |                                                                                                                                                                                                                            |                              |
|-----|----------------------------------------------------------------------------------|----------------------------------------------------------------------------------------------------------------------------------------------------------------------------------------------------------------------------|------------------------------|
|     |                                                                                  |                                                                                                                                                                                                                            | 307                          |
| 306 | Qodaa bishaan keessa keessu si a meeqa dhiqxa?                                   | <ol style="list-style-type: none"> <li>1. Guyyaa Guyyaatti</li> <li>2. Guyyaa Sadii Booda</li> <li>3. Torbeetti Al Takka</li> <li>4. Guyyaa 15 Al Takka</li> <li>5. Hin Dhiqu Lakki</li> <li>6. Kan Biraa _____</li> </ol> |                              |
| 307 | Qodaa bishaan keessa keessu keessaa akkamitti qodaa biraatti waraabda ?          | <ol style="list-style-type: none"> <li>1. Ittiin Naqa</li> <li>2. Keesa Kaa'een Waraaba</li> </ol>                                                                                                                         | Yoo 1 tahe, gara gaaffii 309 |
| 308 | Bishaan keesa kaa'een waraaba yo tae meshaa kan ittiin waraabtan haarka niqabaa? | <ol style="list-style-type: none"> <li>1. Eyyee</li> <li>2. Lakkii</li> </ol>                                                                                                                                              |                              |
| 309 | Bakka bishaan kaa amu daa imni gahuu dandeessii?                                 | <ol style="list-style-type: none"> <li>3. Eyyee</li> <li>4. Lakkii</li> </ol>                                                                                                                                              |                              |
| 310 | Meeshaa itti dhugdan (qalasa) eessa keessan?                                     | <ol style="list-style-type: none"> <li>1. Laffa irraa</li> <li>2. Bakka itti qophaayeeff</li> <li>3. Bakka bishaan itti keessan</li> </ol>                                                                                 |                              |

### **Kutaa 4ffaa: Waa'ee qulqullinaa**

|     |                                     |                                                                                                                                                                                                                                                      |  |
|-----|-------------------------------------|------------------------------------------------------------------------------------------------------------------------------------------------------------------------------------------------------------------------------------------------------|--|
| 401 | Mana fincaanii gosa kam fayyadamtu? | <ol style="list-style-type: none"> <li>1. Bishaan Itti Naqamee Kan Dhiqamu</li> <li>2. Mana Fincaanii Hurka Baasu</li> <li>3. Mana Fincaanii Boolla Qadaada Qabu</li> <li>4. Mana Fincaanii Hin Qabnu (Oyruu)</li> <li>5. Kan Biraa _____</li> </ol> |  |
|-----|-------------------------------------|------------------------------------------------------------------------------------------------------------------------------------------------------------------------------------------------------------------------------------------------------|--|

|     |                                                                                             |                                                                                                                                                   |                              |
|-----|---------------------------------------------------------------------------------------------|---------------------------------------------------------------------------------------------------------------------------------------------------|------------------------------|
| 402 | Mana fincaanii keessan olla waliin fayyadamtuu?                                             | 1. Eyyee<br>2. Lakkii                                                                                                                             | Yoo 2 tahe, gara gaaffii 404 |
| 403 | Deebiin gaffii 402 Eyyee yoo tahe Mana meeqatu mana fincaanii keessan sin waliin fayyadama? | _____                                                                                                                                             |                              |
| 404 | Boilli daa'imani eesatii darbitan?                                                          | 1. Daaiman mana fincaanii nifayadamaa<br>2. Mana fincaanii keessatii naqu<br>3. Lafa irratii<br>4. Koosii wajiin darbudhaan<br>5. Kan Biraa _____ |                              |
| 405 | Koosii (balfa gogogaa) eessattii nayxan?                                                    | 1. Lafa irrattii<br>2. Bola koosii keessatti<br>3. gubudhaan<br>4. koossii akka tortoru godhdhan itti fayyadamu<br>5. Kan Biraa _____             |                              |
| 406 | Balfa dhangal'oo eessattii naqtan?                                                          | 1. Boola keessaattii<br>2. Mana fincaanii keessaattii<br>3. Lafa irrattii ganaqudhaan                                                             |                              |
| 407 | Mana ittii jirtan keessa beeyladooni ni jiraa? (wajiin galaa)                               | 1. Eyyee      2. Lakkii                                                                                                                           |                              |

### **Kutaa 5ffaa: Qulqullina eeggachuu**

|     |                                                           |                         |                              |
|-----|-----------------------------------------------------------|-------------------------|------------------------------|
| 501 | Bishaan warabuun dura harka ni dhiqattaa?                 | 1. Eyyee<br>2. Lakkii   | Yoo 2 tahe, gara gaaffii 503 |
| 502 | Mana fincaanii erga fayyadamtee booda harka ni dhiqattaa? | 1. Eyyee      2. Lakkii | Yoo 2 tahe, gara gaaffii 504 |

|     |                                                                           |                                              |           |                              |
|-----|---------------------------------------------------------------------------|----------------------------------------------|-----------|------------------------------|
| 503 | Deebiin kee eyyee yoo ta'e yogguu harka dhiqattu saamunaa ni fayyadamtaa? | 1. Eyyee                                     | 2. Lakkii |                              |
| 504 | Ijollee erga dhiqan booda harka ni dhiqattaa?                             | 1. Eyyee                                     | 2. Lakkii | Yoo 2 tahe, gara gaaffii 506 |
| 505 | Deebiin kee eyyee yoo ta'e yogguu harka dhiqattu saamunaa ni fayyadamtaa? | 1. Eyyee                                     | 2. Lakkii |                              |
| 506 | Ijoollee osoo hinnyaachisin dura harka ni dhiqataa?                       | 1. Eyyee<br>2. Hogu takka takka<br>3. Lakkii |           | Yoo 3 tahe, gara gaaffii 508 |
| 507 | Deebiin kee eyyee yoo ta'e yogguu harka dhiqattu saamunaa ni fayyadamtaa? | 1. Eyyee                                     | 2. Lakkii |                              |
| 508 | Bakka harka itti dhiqatan niqabdani? (ilaali)                             | 1. Eyyee                                     | 2. Lakkii | Yoo 2 tahe, gara gaaffii 601 |
| 509 | Deebiin kee eyyee yoo ta'e bishaan niqabaa? (ilaali)                      | 1. Eyyee                                     | 2. Lakkii |                              |
| 510 | Saamunaa yoo kin darraa ni jiraa? (ilaali)                                | 1. Eyyee                                     | 2. Lakkii |                              |

### **Kutaa 6ffaa: Mala bishaan ittiin qulqulleessinu**

|     |                                                                                    |                                                                                                   |  |
|-----|------------------------------------------------------------------------------------|---------------------------------------------------------------------------------------------------|--|
| 601 | Maatiin kun malloota bishaan ittiin qulqulleessan ni fayyadamaa?                   | 1. Eyyee<br>2. Lakkii                                                                             |  |
| 602 | Yoo deebiin kee eyyee tahe malloota bishaan itti qulqulleessan isa kam fayyadamtu? | 1. Kiloorinii Itti Naquu<br>2. Calaluu<br>3. Kaa'anii Tursuu<br>4. Danfisuu<br>5. Kan Biraa _____ |  |

**Kutaa 7ffaa: Beekumsa faalama bishaanii**

|     |                                                                                                           |                                                                                                                                                         |  |
|-----|-----------------------------------------------------------------------------------------------------------|---------------------------------------------------------------------------------------------------------------------------------------------------------|--|
| 701 | Bishaan dhugaatii eessatti faalama jettee yaadda?                                                         | <ol style="list-style-type: none"> <li>1. Bakka Waraabamutti</li> <li>2. Mana Keessatti</li> <li>3. Bakka Lachuu</li> <li>4. Kan Biraa _____</li> </ol> |  |
| 702 | Meeshaa bishaan keessa kaa'amuu fi itti waraabamu qulqulleessuun faalama bishaanii ittisa jettee yaaddaa? | <ol style="list-style-type: none"> <li>1. Eyyee</li> <li>2. Lakkii</li> </ol>                                                                           |  |
| 703 | Bishaan waraabuun dura harka dhiqachuu faalama bishaanii ittisa jettee yaaddaa?                           | <ol style="list-style-type: none"> <li>1. Eyyee</li> <li>2. Lakkii</li> </ol>                                                                           |  |
| 704 | Mana fincaanii fayyadamuun booda harka dhiqachuun faalama bishaanii ni ittisa jettee yaaddaa?             | <ol style="list-style-type: none"> <li>1. Eyyee</li> <li>2. Lakkii</li> </ol>                                                                           |  |
| 705 | Mana fincaaniitti sirnaan fayyadamuun faalama bishaanii ni hambisa jettaa yaaddaa?                        | <ol style="list-style-type: none"> <li>1. Eyyee</li> <li>2. Lakkii</li> </ol>                                                                           |  |
| 706 | Mana keessatti bishaan qulqulleessuun faalama bishaanii ni hambisa jettee yaaddaa?                        | <ol style="list-style-type: none"> <li>1. Eyyee</li> <li>2. Lakkii</li> </ol>                                                                           |  |
| 707 | Baatii sadeen dabree keessaa waa'ee bishaani fi qulqulina bartanii jirtu?                                 | <ol style="list-style-type: none"> <li>1. Eyyee</li> <li>2. Lakkii</li> </ol>                                                                           |  |

## Kutaa 8ffaa: Gaaffiilee Haala Qabeenya Maatii Ilaallatan

Kanneen armaan gadii keessaa warreen kamtu mana keessaniitti argamaa?

| Gosa qabeenyaa               | Deebii     |             |
|------------------------------|------------|-------------|
| <b>Beeylada</b>              |            |             |
| Sangaa                       | Lakki (0)  | Eeyyeen (1) |
| Sa'aa                        | Lakki (0)  | Eeyyeen (1) |
| Jabbii                       | Lakki (0)  | Eeyyeen (1) |
| Hoolaa                       | Lakki (0)  | Eeyyeen (1) |
| Re'ee                        | Lakki (0)  | Eeyyeen (1) |
| Farda                        | Lakki (0)  | Eeyyeen (1) |
| Harree                       | Lakki (0)  | Eeyyeen (1) |
| Lukkuu                       | Lakki (0)  | Eeyyeen (1) |
| <b>Meeshaalee dhaabbataa</b> |            |             |
| Televizinii                  | Lakki (0)  | Eeyyeen (1) |
| Raadiyoonii                  | Lakki (0)  | Eeyyeen (1) |
| Elektirikii                  | Lakki (0)  | Eeyyeen (1) |
| Friiji                       | Lakki (0)  | Eeyyeen (1) |
| Bilbila manaa                | Lakki (0)  | Eeyyeen (1) |
| Mobaayilii                   | Lakki (0)  | Eeyyeen (1) |
| Konkolaataa                  | Lakki (0)  | Eeyyeen (1) |
| Motarsaayikilii              | Lakki (0)  | Eeyyeen (1) |
| Saaykilii                    | Lakki (0)  | Eeyyeen (1) |
| Gaarii                       | Lakki (0)  | Eeyyeen (1) |
| Faaya (warqee, qarshii)      | Lakki (0)  | Eeyyeen (1) |
| Mana jireenyaa dhuunfaa      | Lakkii (0) | Eeyyeen (1) |
| Lafa qotisaa                 | Lakki (0)  | Eeyyeen (1) |
| <b>Meeshaalee omishaa</b>    |            |             |
| Maarashaa                    | Lakki (0)  | Eeyyeen (1) |
| Qottoo                       | Lakki (0)  | Eeyyeen (1) |
| Doomaa                       | Lakki (0)  | Eeyyeen (1) |



|                               |                                                           |                         |
|-------------------------------|-----------------------------------------------------------|-------------------------|
| Akaafaa                       | Lakki (0)                                                 | Eeyyeen (1)             |
| Hamtuu                        | Lakki (0)                                                 | Eeyyeen (1)             |
| Gaagura kaannisaa kan amayyaa | Lakki (0)                                                 | Eeyyeen (1)             |
| Gaagura kaannisaa kan aadaa   | Lakki (0)                                                 | Eeyyeen (1)             |
| <b>Haala mana jireenyaa</b>   |                                                           |                         |
| Bishaan ujummoodhan argamu    | Lakki (0)                                                 | Eeyyeen (1)             |
| Lafa mana keessaa             | Biyjee (0)                                                | Cimintoo/ xaawullaa (1) |
| Haala mana fincaanii          | Qulqullina kan hin qabne/<br>gutumaatti kan hin qabne (0) | Kan qulqullina qabu (1) |
| <b>Meeshalee manaa biroo</b>  |                                                           |                         |
| Soofaa                        | Lakki (0)                                                 | Eeyyeen (1)             |
| Siree                         | Lakki (0)                                                 | Eeyyeen (1)             |
| Xarabeezzaa                   | Lakki (0)                                                 | Eeyyeen (1)             |
| Taa'umsa                      | Lakki (0)                                                 | Eeyyeen (1)             |
| Istoovii                      | Lakki (0)                                                 | Eeyyeen (1)             |

### **Kutaa 9ffaa: Formatii bishaan mana iraa kan fudhamee**

|                                              |              |
|----------------------------------------------|--------------|
| lakk. adda baasii abbaa warraa (ID)<br>_____ | Guyyaa _____ |
| Aradaa _____                                 | Sa'a _____   |
| Ganda _____                                  |              |
| Maqaa Bishaan Madda _____                    |              |
| Coodii Bishaan _____                         |              |

Maqaa \_\_\_\_\_

Mallattoo \_\_\_\_\_

### Kutaa 10ffaa: Formatii bishaan Madda iraa kan fudhuu

|                           |              |
|---------------------------|--------------|
| Maqaa Bishaan Madda _____ | Guyyaa _____ |
| Aradaa _____              | Sa'a _____   |
| Ganda _____               |              |
| Coodii Bishaan _____      |              |

Maqaa \_\_\_\_\_

Mallattoo \_\_\_\_\_

### Kutaa 10ffaa: Debi Laboraatoorrii Irra Argamee

| Lak. | Goosa Yaalii                              | Debi                                   | Yaada    |
|------|-------------------------------------------|----------------------------------------|----------|
| 1.   | Membrane Filtration<br>(Biishaan Calaluu) | _____ Thermotolerant<br>colonies/100ml | Coliform |

Maqaa \_\_\_\_\_

Mallattoo \_\_\_\_\_

Guyyaa \_\_\_\_\_
